# Supplementary material for: One step sample treatment and loading using a deep eutectic solvent immobilized in a porous substrate for thermal ionization mass spectrometry of Pu(iv) ions
Source: Royal Society of Chemistry journal article supplement (doi:10.1039/d0ja00231c), 2020-01-01
Supplement: d0ja00231c1.pdf [file d0ja00231c1.pdf]

## Electronic Supplementary Information (ESI†)

### One step sample treatment and loading using deep eutectic solvent immobilized in porous substrate for thermal ionization mass spectrometry of Pu(IV) ions

Raju V. Shah,<sup>a,c\*</sup> Ashok K. Pandey,<sup>b,c</sup> S. Jagadish Kumar,<sup>a</sup> Sumana Paul,<sup>a</sup> Radhika M. Rao,<sup>a\*</sup> P.G. Jaison<sup>a</sup>

---

<sup>a</sup> Fuel Chemistry Division, Bhabha Atomic Research Centre, Trombay, Mumbai-400 085, India. Email: [rvshah\\_243@rediffmail.com](mailto:rvshah_243@rediffmail.com) (R.V. Shah); [ashokk@barc.gov.in](mailto:ashokk@barc.gov.in) (A.K.Pandey); [jkumars@barc.gov.in](mailto:jkumars@barc.gov.in) (S. Jagadish Kumar); [sumana@barc.gov.in](mailto:sumana@barc.gov.in) (Sumana Paul); [rmrao@barc.gov.in](mailto:rmrao@barc.gov.in) (R.M. Rao); [jaipg@barc.gov.in](mailto:jaipg@barc.gov.in) (P.G.Jaison)

<sup>b</sup> Radiochemistry Division, Bhabha Atomic Research Centre, Trombay, Mumbai-400 085, India.

<sup>c</sup> Homi Bhabha National Institute, TSH, Anushaktinagar, Mumbai-400 094, India.

**Fig. S1.** The mechanochemical synthesis of DES.

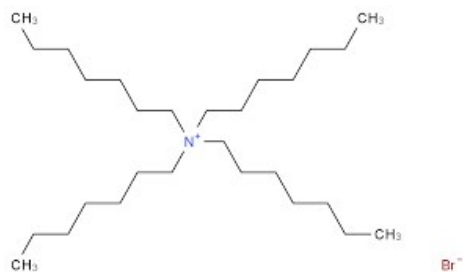

M.W. : 490.7 g/mol  
Mp : 87-89 °C

1:2  
→

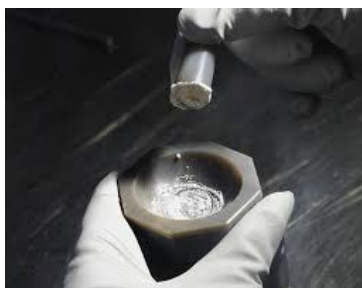

→

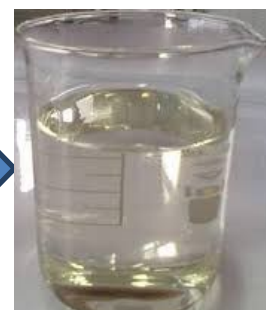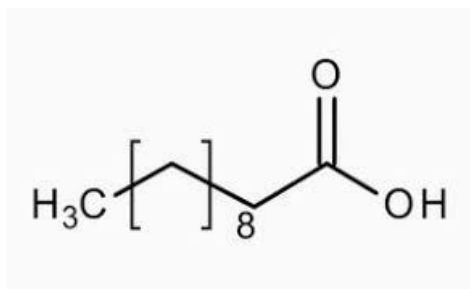

M.W.: 186.3  
mp : 28-31 °C

Tetraheptylammoniumbromide (≥99.0%) and undecanoic acid (98%) were obtained from Sigma-Aldrich.

**Fig.S2.** Preparation of DES-PPM by physical immobilization of UDA-THAB DES in the microporous poly(propylene) membrane.

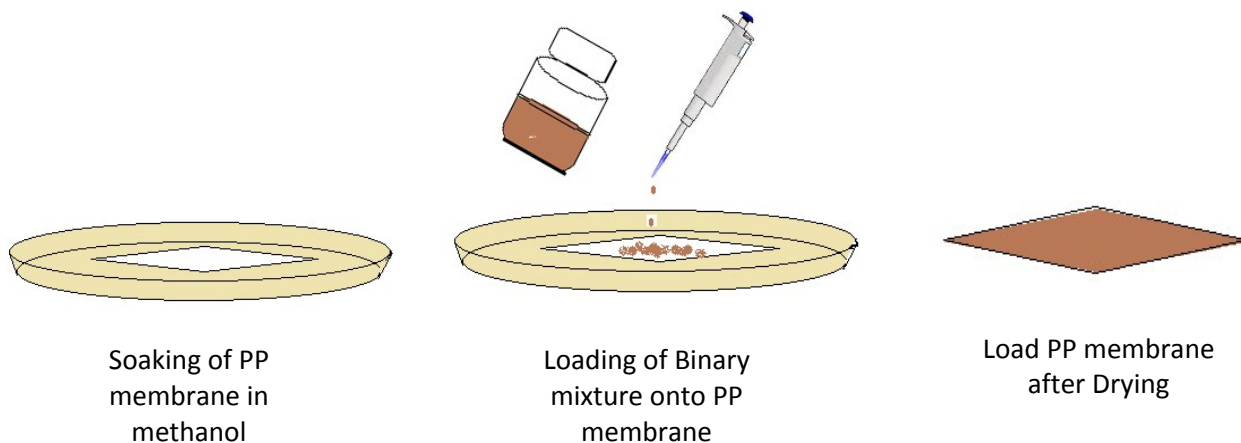

Membrane: Poly (propylene) membrane (Sterlitech make) having  $0.2 \mu\text{m}$  pore-size and  $150 \pm 15 \mu\text{m}$  thickness. Methanol-AR was obtained from S.D.Fine Chemical Ltd., Mumbai.

**Fig. S3.** The sorption profile of Pu (IV) from aqueous solution to the DES-PPM as function of equilibration time.

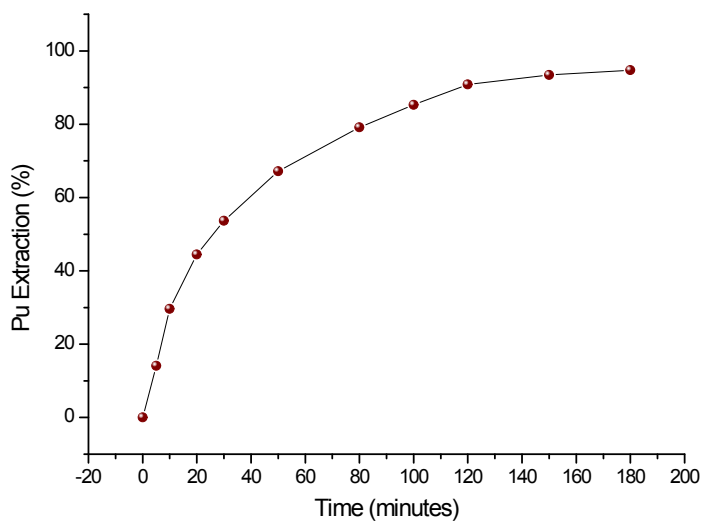

Conditions for extraction: Aqueous phase-3 M  $\text{HNO}_3$ , Volume: 10 ml, Membrane size: 1 cm \* 2 cm, stirring @ 600 rpm.

Fig. S4. TGA/DTA analyses of UDA-THAB DES.

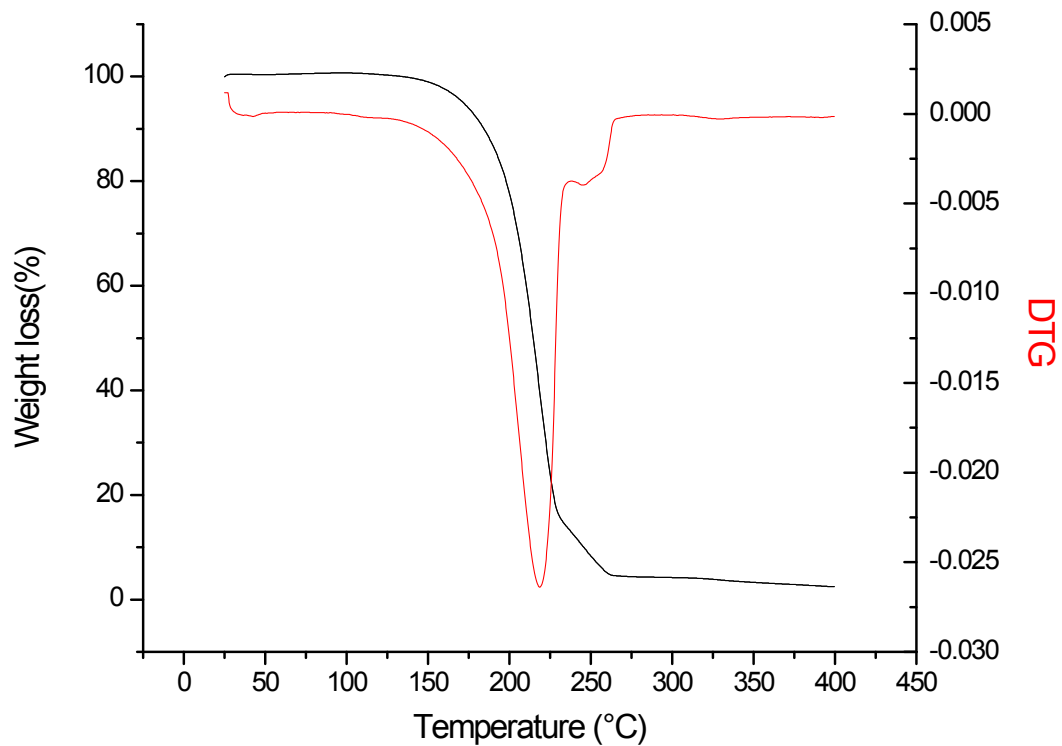

**Fig. S5.** DSC thermogram of the UDA-THAB DES.

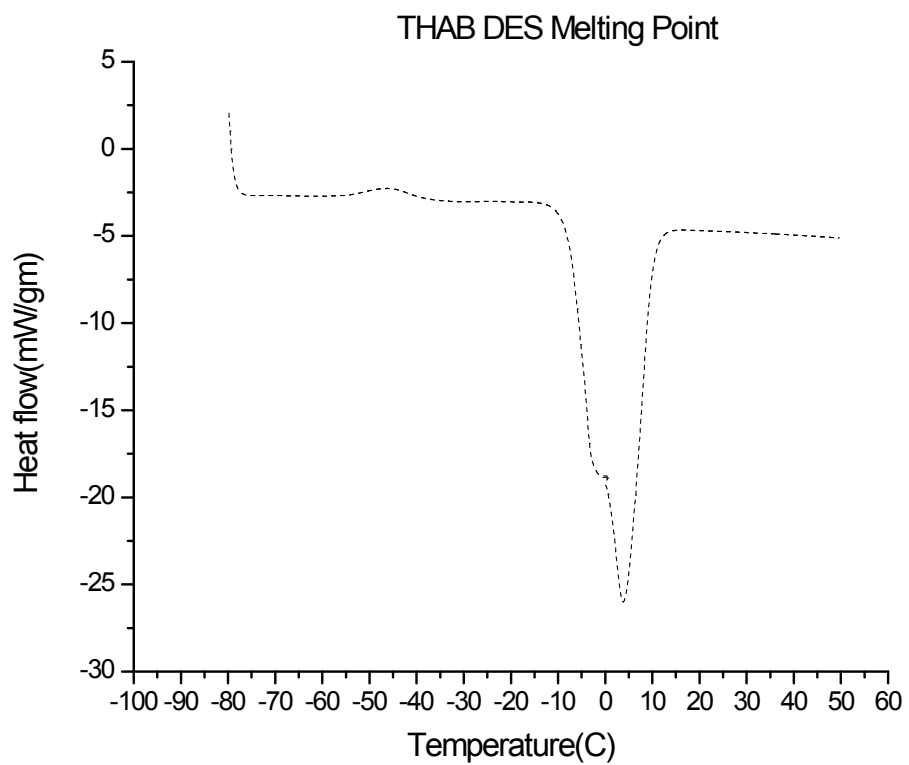

The melting point temperature of the prepared DES was studied using differential scanning calorimetry (Mettler Toledo DSC1 STARe).

**Fig. S6.** FTIR spectra of THAB, UDA and UDA-THAB DES and corresponding overlapped spectra.

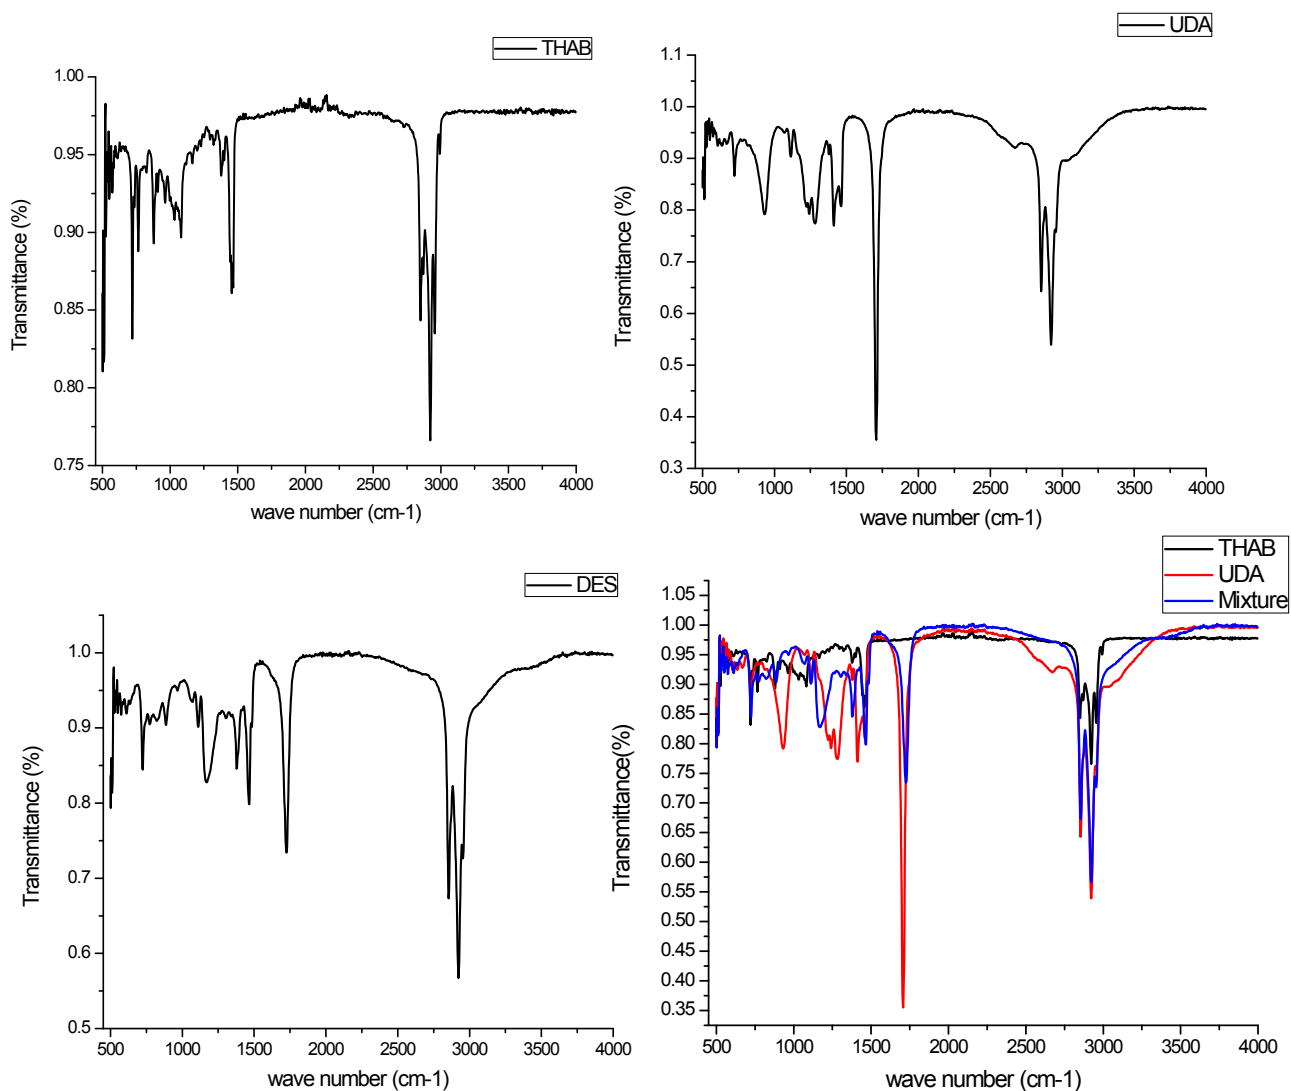

All Fourier transformed infrared (FTIR) spectra were recorded on a PerkinElmer Spectrum Two spectrometer equipped with a Spectrum Two UATR (universal attenuated total reflectance) module. All samples were scanned over a wavenumber range of 450-4000 cm<sup>-1</sup>.

**Table S1.** The UDA-THAB DES immobilization in the microporous poly(propylene) membrane (PPM). Dimensions of membrane samples used were 5cm×5cm.

| Sample No. | Wt. of PPM before loading (g) | Wt. of PP membrane after DES loading (g) | %Wt. Gain | Average % Wt. gain ( $\pm$ % RSD-3 $\sigma$ ) |
|------------|-------------------------------|------------------------------------------|-----------|-----------------------------------------------|
| 1          | 0.0569                        | 0.3816                                   | 570       | 556 $\pm$ 3                                   |
| 2          | 0.0600                        | 0.3853                                   | 542       |                                               |
| 3          | 0.0592                        | 0.3884                                   | 556       |                                               |

**Table S2.** Isotopic Composition and concentration of Plutonium Spikes.

| Isotope Ratio ( $\pm$ % RSD-3 $\sigma$ )              | <sup>239</sup> Pu Spike | <sup>240</sup> Pu Spike |
|-------------------------------------------------------|-------------------------|-------------------------|
| <sup>238</sup> Pu/ <sup>239</sup> Pu                  | 0.00123 $\pm$ 3         | 0.00273 $\pm$ 3         |
| <sup>240</sup> Pu/ <sup>239</sup> Pu                  | 0.010860 $\pm$ 0.05     | 0.40382 $\pm$ 0.005     |
| <sup>241</sup> Pu/ <sup>239</sup> Pu                  | 0.000114 $\pm$ 1        | 0.030748 $\pm$ 0.1      |
| <sup>242</sup> Pu/ <sup>239</sup> Pu                  | 0.000026 $\pm$ 3        | 0.031786 $\pm$ 0.1      |
| Concentration ( $\mu$ g/g) ( $\pm$ % RSD-1 $\sigma$ ) | 11.25 $\pm$ 0.1         | 18.91 $\pm$ 0.2         |

### Determination of plutonium concentration using Isotope dilution mass spectrometry

A known weight  $W_{sp}$  of a pre-calibrated spike solution, having Pu concentration  $C_{sp}$ , is added to a known weight  $W_{sa}$  of the sample. From the change in the <sup>240</sup>Pu/<sup>239</sup>Pu atom ratios in the spiked mixture ( $R_m$ ) with respect to that in the sample ( $R_{sa}$ ) and spike ( $R_{sp}$ ), plutonium concentration is calculated using following equation:

$$C_{sa} = \frac{C_{sp} \times W_{sp}}{W_{sa} \times R_{sp}} \times \frac{(R_{sp} - R_m)}{(R_m - R_{sa})} \times \frac{A.F._{sp}}{A.F._{sa}} \times \frac{(Avg.At.Wt)_{sa}}{(Avg.At.Wt)_{sp}}$$

where,  $C_{sa}$  and  $C_{sp}$  are Pu concentrations in sample and spike,  $W_{sa}$  and  $W_{sp}$  are the weights of sample and spike in the mixture,  $R_{sa}$ ,  $R_{sp}$  and  $R_m$  are the <sup>240</sup>Pu/<sup>239</sup>Pu atom ratios in sample, spike and mixture, and A.F. and Avg.At.Wt. are the atom fractions and average atomic weights, respectively.
